# Supplementary material for: Sub-millisecond Control of Neuronal Firing by Organic Light-Emitting Diodes
Source: PubMed Central journal article supplement (PMC6817475; doi:10.3389/fbioe.2019.00278), 2019-10-22
Supplement: Image_1.pdf [file Image_1.pdf]

# **SUB-MILLISECOND CONTROL OF NEURONAL FIRING BY ORGANIC LIGHT-EMITTING DIODES**

Bruno F.E. Matarèse<sup>1\*°</sup>, Paul L.C. Feyen<sup>2,3\*°</sup>, John de Mello<sup>1,4†</sup>, Fabio Benfenati<sup>2,5†</sup>

<sup>1</sup> Department of Chemistry, Imperial College London, South Kensington Campus, London SW7 2AZ, UK; <sup>2</sup> Center for Synaptic Neuroscience and Technology, Istituto Italiano di Tecnologia, Largo Rosanna Benzi 10, 16132, Genoa, Italy; <sup>3</sup> Department of Experimental Medicine, Section of Physiology, University of Genova, Viale Benedetto XV 3, 16132 Genoa, Italy; <sup>4</sup> Centre for Organic Electronic Materials, Department of Chemistry, NTNU, N-7491 Trondheim, Norway; <sup>5</sup> IRCCS Ospedale Policlinico San Martino, Genova, Italy

\*equal contribution

†corresponding authors

## **SUPPLEMENTARY FIGURES**

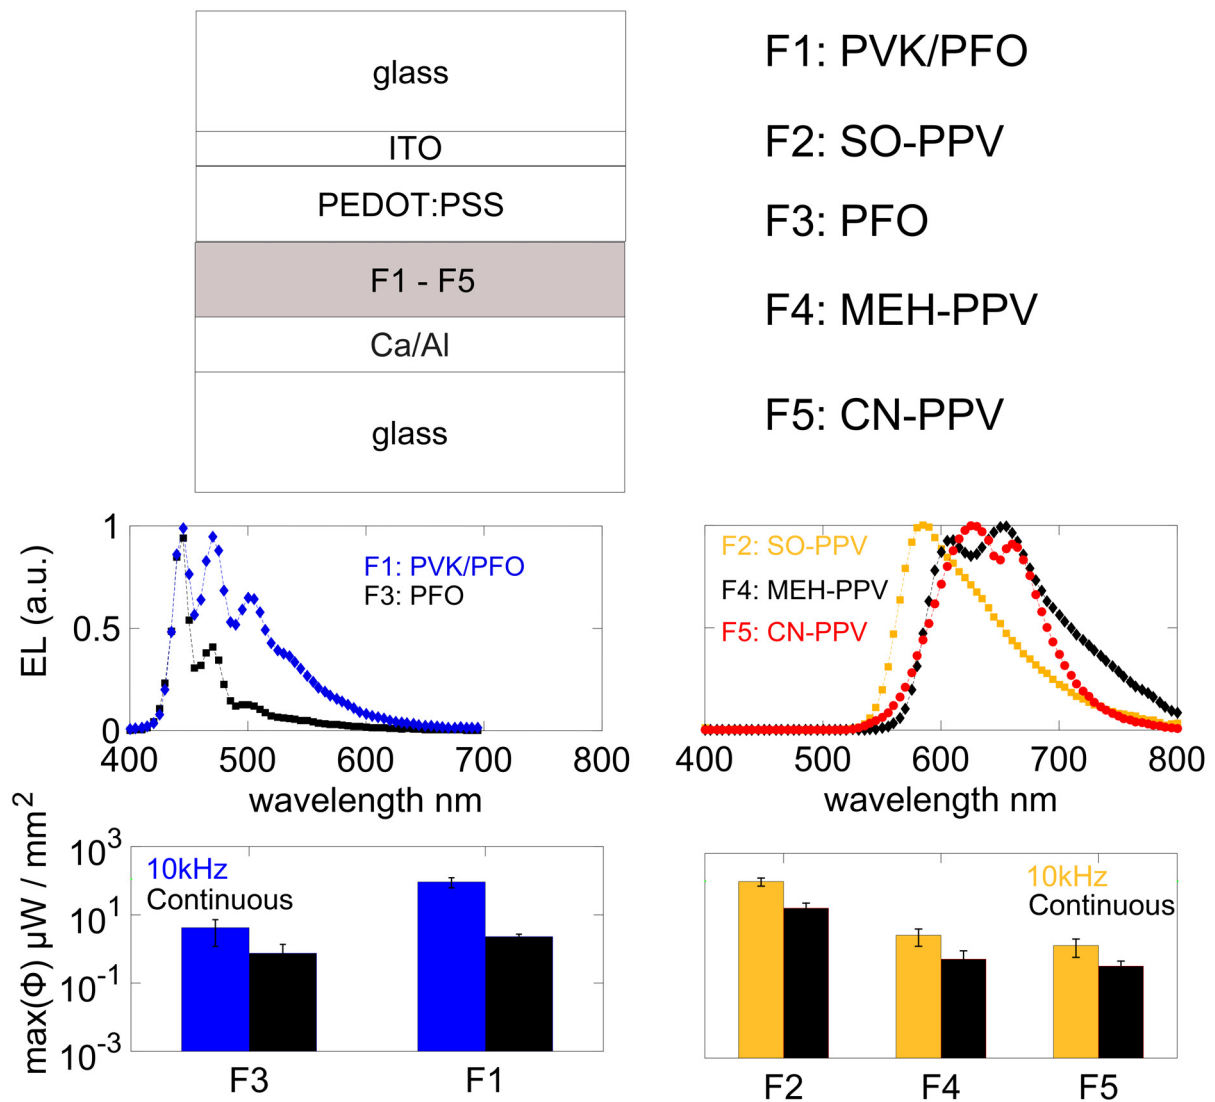

**Figure S1. Characterization of a series of blue and red solution-processed OLEDs for optogenetics.** *Top:* Device structure and naming representing the device number to their active layer for the fluorescent device structure. *Middle:* Electroluminescent spectra of devices. *Bottom:* Maximal stable output in continuous bias operation (black bars) or pulsed mode operation (10 kHz 50% duty cycle) (colored bars).

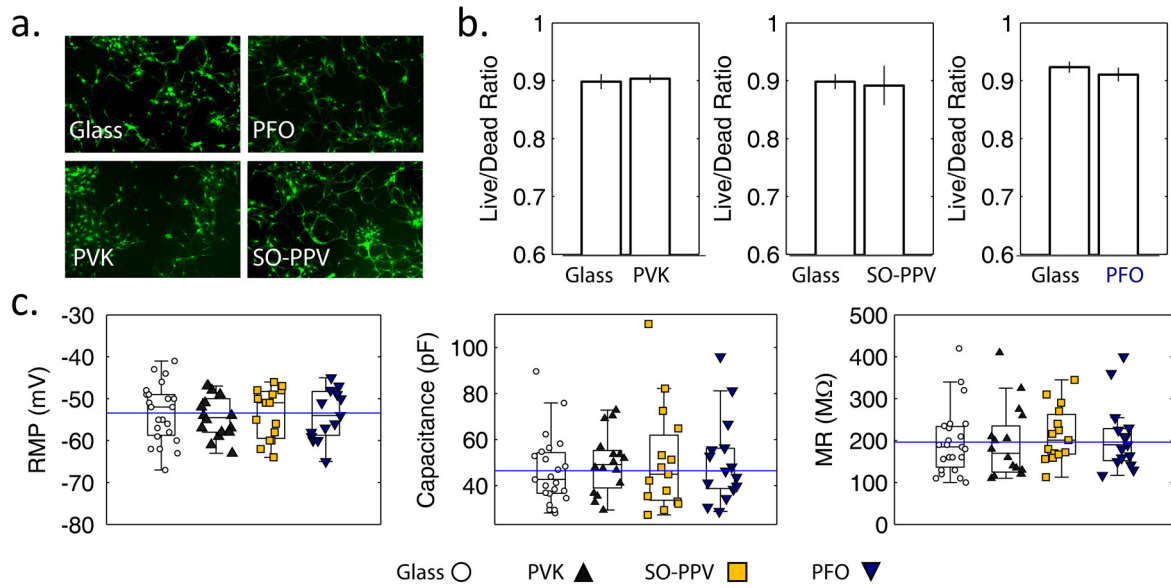

**Figure S2. Primary neurons are not affected by conjugated polymers.** (a) Primary hippocampal neurons prepared from the embryonic brain were plated on semiconducting polymers and recorded by patch-clamp between 14-21 DIV. (b) Cell viability was assessed by fluorescein diacetate and propidium iodide staining and expressed as live/dead cell ratio (means $\pm$ sem). (c) Resting membrane potential, capacitance and membrane resistance for the neurons grown over glass vs those grown on the tested polymers ( $p > 0.05$ ). Individual values and means are shown with symbols and lines, respectively.

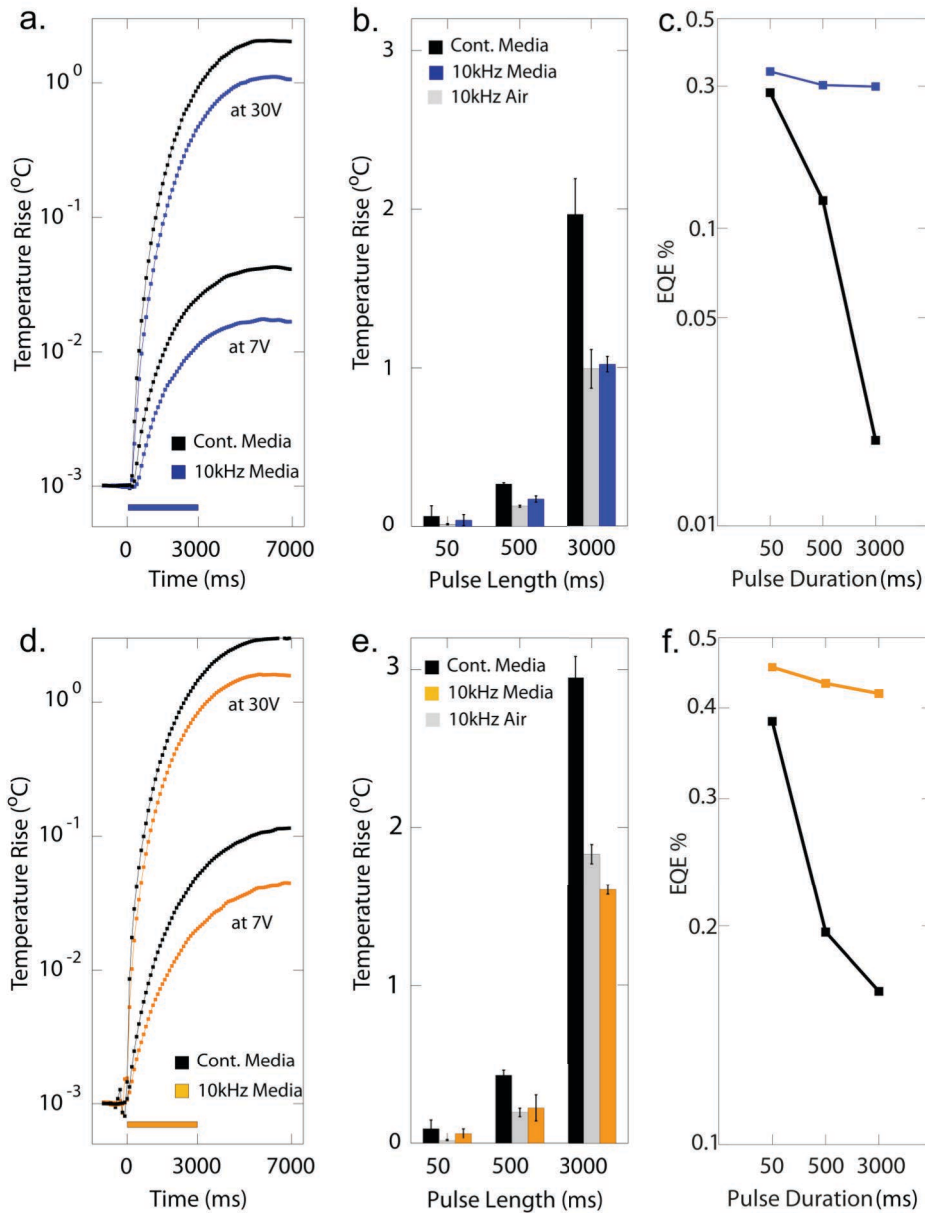

**Figure S3. Heating characteristics of blue and orange OLEDs.** (a,d) Temperature rise at the surface of a coverslip positioned onto the blue (a) and orange (d) OLEDs immersed in cell-culture medium *versus* time for either DC (cont; black traces) or 10 kHz square-wave (colored traces) stimulation at either 7 V (lower traces) or 30V (upper traces) drive voltage. The temperature rise was followed for 7 s, with the OLEDs operated for the first 3 s. (b,e) Pulse-length dependence of temperature rise under DC and 10 kHz square-wave operation with 30 V drive voltage for blue (b) and orange (e) OLEDs under the various experimental conditions (cell medium for continuous operation; air and cell medium for pulsed operation). (c,f) The external quantum efficiency (EQE) of OLEDs for pulse durations of 50, 500 and 3000 ms for blue (c) and orange (f) OLEDs.

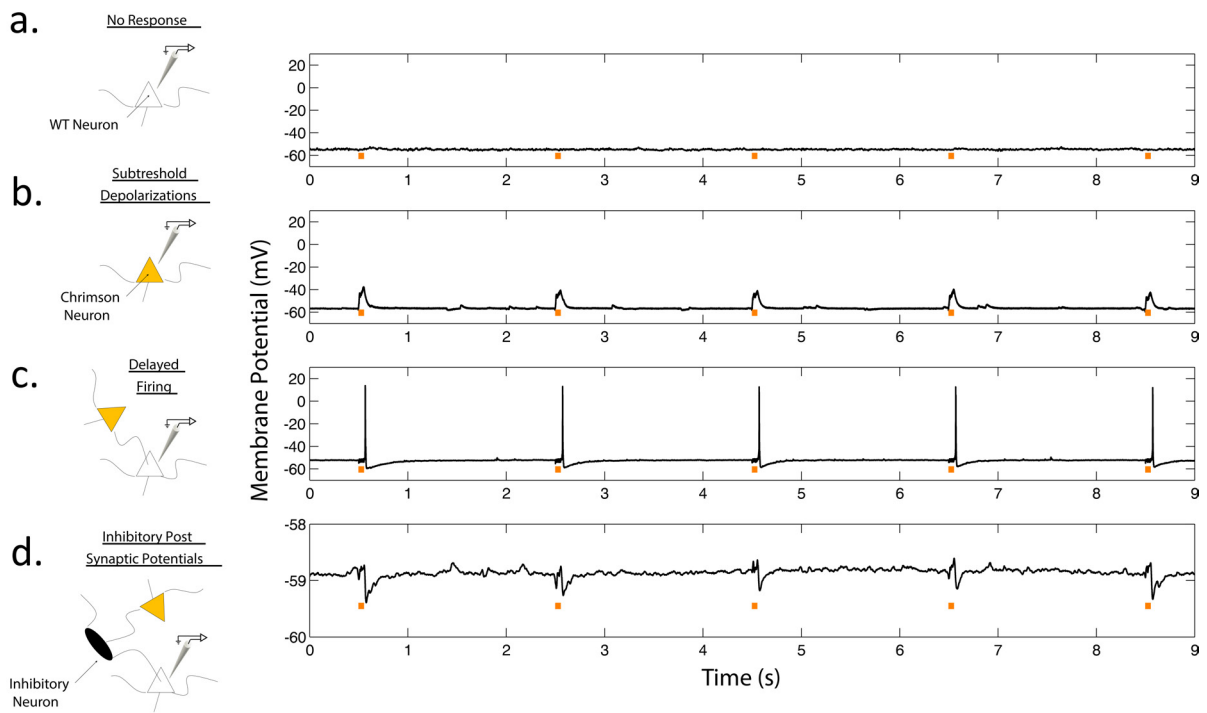

**Figure S4. Responses of primary cortical neurons to OLED(F2)-generated light stimuli.** ChromsonR-transduced and mock-transduced (WT) cortical neurons grown under high density conditions were subjected to 50 ms OLED (F2) pulsed light stimuli. **(a)** Representative recording from a WT neuron. **(b)** A ChromsonR-transduced neuron responds to the optical stimulation with subthreshold depolarizations. **(c)** WT neuron with consistent delayed action potential firing in response to 50 ms illumination. **(d)** Several neurons, including both control and ChromsonR-expressing cells, displayed inhibitory postsynaptic potentials in response to light.
